# Supplementary material for: Regional and seasonal radiative forcing by perturbations to aerosol and ozone precursor emissions
Source: Copernicus journal article supplement (doi:10.5194/acp-16-13885-2016), 2016-11-09
Supplement: Supplementary file 2 [file acp-16-13885-2016-supplement.zip]

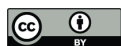

## *Supplement of*

# **Regional and seasonal radiative forcing by perturbations to aerosol and ozone precursor emissions**

**Nicolas Bellouin et al.**

*Correspondence to:* Nicolas Bellouin (n.bellouin@reading.ac.uk)

- [acp-16-13885-2016-supplement-title-page.pdf](#)
- [eclipse\\_t4-3\\_results\\_nonitr\\_final.xlsx](#)
- [eclipse\\_t4-3\\_results\\_oslonitr\\_28N-60N\\_final.xlsx](#)
- [eclipse\\_t4-3\\_results\\_oslonitr\\_28S-28N\\_final.xlsx](#)
- [eclipse\\_t4-3\\_results\\_oslonitr\\_60N-90N\\_final.xlsx](#)
- [eclipse\\_t4-3\\_results\\_oslonitr\\_90S-28S\\_final.xlsx](#)
- [eclipse\\_t4-3\\_results\\_oslonitr\\_final.xlsx](#)
- [eclipse\\_t43\\_paper\\_supplementary\\_figures.pdf](#)

The copyright of individual parts of the supplement might differ from the CC-BY 3.0 licence.
